# Supplementary material for: Escape behaviors in prey might have underlain the evolution of pennaceous plumage in predatory dinosaurs
Source: Research Square preprint supplement (doi:10.21203/rs.3.rs-2415346/v1), 2023-01-10
Supplement: Supplementary file 1 [file 94320df61bce74a9e4661f31.docx]

**Supplementary Video Legends**

**Video 1.** High-speed video (960 fps) showing a grasshopper’s escape behavior in response to the flush-display by the robot. The escape happens at the forelimbs’ spreading stage of the flush-display movement. The white arrow indicates the location of the grasshopper before the jump.

**Video 2.** High-speed video (960 fps) showing a grasshopper’s escape behavior in response to the flush-display by the robot. The escape happens at the forelimb’s folding stage of the flush-display movement. The white indicates the location of the grasshopper before the jump.

**Video 3.** High-speed video (960 fps) showing a grasshopper’s escape behavior in response to the robot’s tail-upward movement. The white arrow indicates the location of the grasshopper before the jump.

**Video 4.** The animation of the forelimb movements with proto-wings.

**Video 5.** The animation of the forelimb movements without proto-wings.

**Video 6.** High-speed video (960 fps) of the forelimbs’ movements of the robot starting from the resting position and ending with the position of maximal values of the joint angles (defined in Extended Data Fig. 4). The flickering in the video is caused by artificial light pulsating at 60 Hz.

**Video 7.** The looming circle stimulus used in the neurophysiological experiments.
